# Supplementary material for: Expectations and satisfaction with antenatal care among pregnant women with a focus on vulnerable groups: a descriptive study in Ghent
Source: PubMed Central journal article supplement (PMC4667492; doi:10.1186/s12905-015-0266-2), 2015-12-02
Supplement: 12905_2015_266_MOESM1_ESM.pdf [file 12905_2015_266_MOESM1_ESM.pdf]

## Annex 1: Scale Expectations

|                                                                                                                  |
|------------------------------------------------------------------------------------------------------------------|
| Complete Care                                                                                                    |
| I expected to be seen sooner for my first antenatal visit                                                        |
| I expected to have my antenatal visits take a long time                                                          |
| I expected to get more from my antenatal visits than being weighed and having my baby's heart checked            |
| I expected to receive information during my visits without having to ask so many questions                       |
| Provider Continuity                                                                                              |
| I expected to have one provider (=gynaecologist, midwife or doctor) that I routinely see for my antenatal visits |
| I expected to have the provider that I routinely see deliver my baby                                             |
| Personalized Care                                                                                                |
| I expected my provider to care how I feel mentally as well as physically                                         |
| I expected my provider to be gentle during my physical exam                                                      |
| I expected someone to listen to my problems                                                                      |
| I expected a referral when I tell the clinic/office staff about a problem                                        |
| Other Services                                                                                                   |
| I expected the services of a social worker to be part of antenatal care                                          |
| I expected the services of a nutritionist to be part of antenatal care                                           |
