# Supplementary material for: Expectations and satisfaction with antenatal care among pregnant women with a focus on vulnerable groups: a descriptive study in Ghent
Source: PubMed Central journal article supplement (PMC4667492; doi:10.1186/s12905-015-0266-2), 2015-12-02
Supplement: 12905_2015_266_MOESM2_ESM.pdf [file 12905_2015_266_MOESM2_ESM.pdf]

## Annex 2: Scale Satisfaction

|                                                                                                                    |
|--------------------------------------------------------------------------------------------------------------------|
| <b>Information</b>                                                                                                 |
| I am satisfied with the explanation my provider gave to me of what was going to happen during my antenatal visits  |
| I am satisfied with the explanation my provider gave to me about medical procedures                                |
| I am satisfied with the information my provider gave to me about how things are going with my pregnancy            |
| I am satisfied with the kinds of things my provider discussed during my antenatal visits                           |
| I am satisfied with the explanation my provider gave to me about what I can expect about parenting a new-born      |
| I am satisfied with the way my provider has prepared me for labour and delivery                                    |
| <b>Provider Care</b>                                                                                               |
| I am satisfied with the way my provider treats me                                                                  |
| I am satisfied with the respect that I am shown by my provider                                                     |
| I am satisfied with the quality of care that I receive from my provider                                            |
| I am satisfied with the way I am made to feel that I am not wasting my provider's time                             |
| I am satisfied with being able to ask questions without embarrassment                                              |
| I am satisfied with not having to repeat my story every time I come in for a visit                                 |
| <b>Staff Interest</b>                                                                                              |
| I am satisfied with the way the staff expresses concern about my overall personal situation                        |
| I am satisfied with the time the staff spends talking about things of interest to me                               |
| I am satisfied with the way the staff treats me                                                                    |
| I am satisfied with the time the staff takes with me even though I do not have problems with this pregnancy        |
| I am satisfied with the interest and concern the staff has shown me                                                |
| I am satisfied with the way the staff deals with all my medical problems                                           |
| <b>System Characteristics</b>                                                                                      |
| I am satisfied with the amount of time I wait to be seen by my provider                                            |
| I am satisfied with the total amount of time I spend at the office/clinic                                          |
| I am satisfied with the parking facilities of the office/clinic                                                    |
| I am satisfied with the waiting room facilities of the office/clinic                                               |
| I am satisfied with the examination room of the office/clinic                                                      |
| I am satisfied with my ability to schedule antenatal visits at a time convenient for me                            |
| I am satisfied with how easy it is to reschedule my antenatal visits                                               |
| I am satisfied with how easy it was to get antenatal care early in my pregnancy (that is, before the fourth month) |
| I am satisfied with having all the recommended tests                                                               |
| I am satisfied with the number of antenatal visits I made until now                                                |
